# Supplementary material for: CCR4 and CAF1 deadenylases have an intrinsic activity to remove the post-poly(A) sequence
Source: PubMed Central journal article supplement — RNA. 2016 Oct;22(10):1550–9. doi: 10.1261/rna.057679.116 (PMC5029453; doi:10.1261/rna.057679.116), 2016-10
Supplement: supp_057679.116_Supplemental_FigureS1.pdf [file supp_057679.116_Supplemental_FigureS1.pdf]

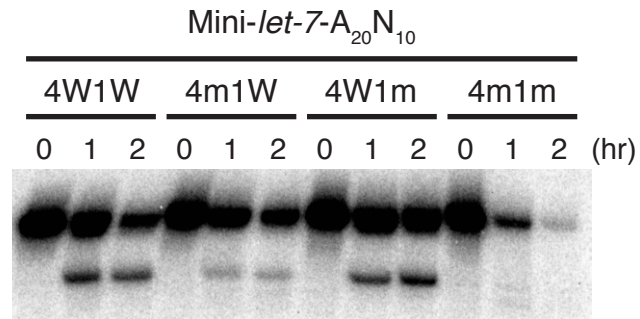

**Supplemental Figure S1.** Deadenylation assay for Mini-*let-7-A*<sub>20</sub>N<sub>10</sub> with the four types of recombinant CCR4/CAF1 heterodimer. CCR4 and CAF1 could remove the N<sub>10</sub> post-poly(A) sequence containing all four bases.
